# Supplementary material for: Effects of Different Nutritional Patterns and Physical Activity on Body Composition: A Gender and Age Group Comparative Study
Source: MDPI journal article supplement (doi:10.3390/foods13040529), 2024-02-08
Supplement: s1 [file s1]

**Table S1. Classification of Sports Activities by Category.**

| Endurance Sports | Skill Sports | Strength Training       | Team Sports     |
|------------------|--------------|-------------------------|-----------------|
| Acquagym         | Boxing       | Calisthenics            | Acrobatic Dance |
| Cycling          | Capoeira     | Functional Bodybuilding | Basketball      |
| Elliptical Bike  | Golf         | Home Work Out           | Handball        |
| Hydrobike        | Gymnastics   | Pilates                 | Hockey          |
| Rowing           | Horse Riding | Powerlifting            | Rugby           |
| Running          | Martial arts | Pump                    | Soccer          |
| Spinning         | Padel        | Weightlifting           | Volleyball      |
| Step             | Ping Pong    |                         | Waterpolo       |
| Total Body       | Pole Dance   |                         |                 |
| Treadmill        | Skating      |                         |                 |
| Trekking         | Tai Qui      |                         |                 |
| Walking          | Tennis       |                         |                 |
|                  | Yoga         |                         |                 |

Table S1. This table categorizes a diverse range of sports activities into four distinct groups: Endurance Sports, Skill Sports, Strength Training, and Team Sports. Each category is carefully curated to reflect the primary characteristics and demands of the sports listed, providing a clear and comprehensive overview of various physical activities.
